# Supplementary material for: Citizen Social Lab: A digital platform for human behavior experimentation within a citizen science framework
Source: PLOS journal article supplement (doi:10.1371/journal.pone.0207219), 2018-12-06
Supplement: S1 (10.1371/journal.pone.0207219.s001) [file journal.pone.0207219.s001]

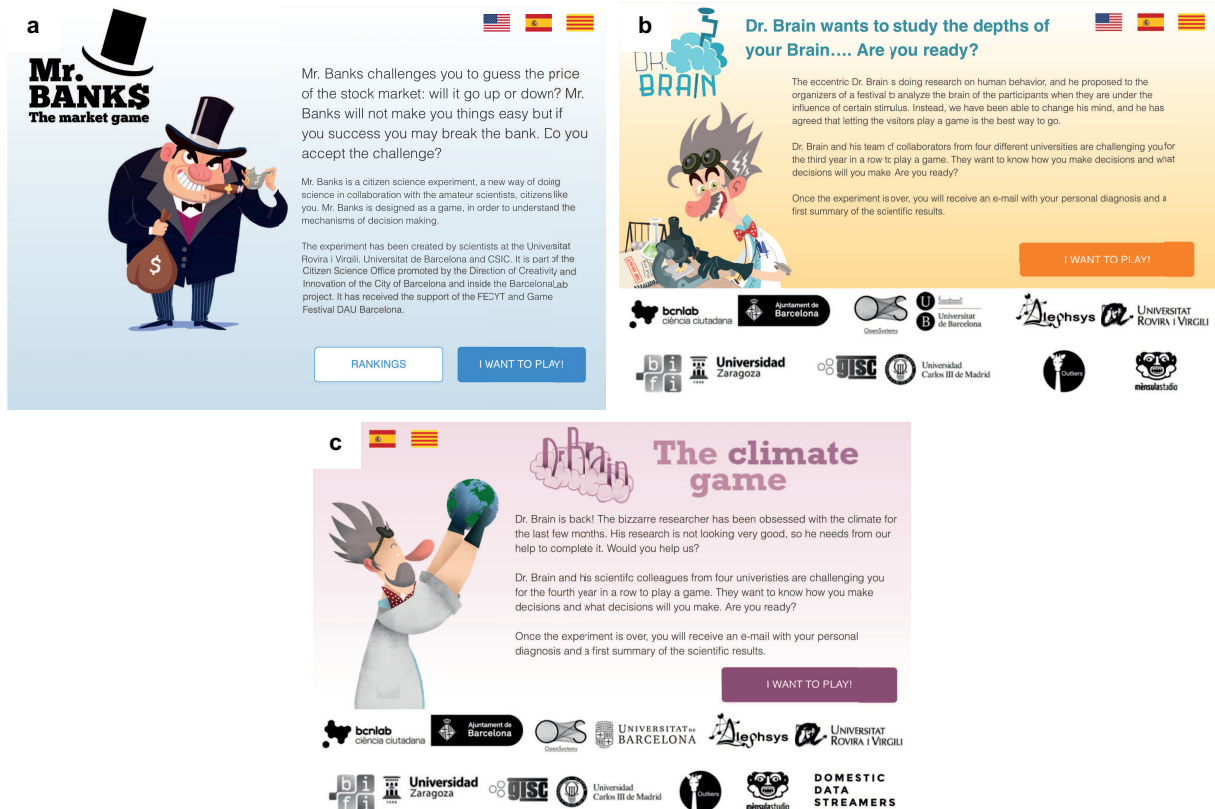

**Fig S1: Home screen of Mr.Banks, Dr.Brain and The Climate Game.** Screenshots of the initial screen of three experiments (a) Mr. Banks, (b) Dr. Brain and (c) The Climate Game. In this screen we introduce a character and a narrative to attract the attention of the public and to motivate them to participate. Images of the character created by Mensula Studio are licensed under CC BY 4.0.
