# Supplementary material for: Citizen Social Lab: A digital platform for human behavior experimentation within a citizen science framework
Source: PLOS journal article supplement (doi:10.1371/journal.pone.0207219), 2018-12-06
Supplement: S4 (10.1371/journal.pone.0207219.s004) [file journal.pone.0207219.s004]

**Table S1: Market imitation.** Biases with respect to the market (Participant/Market)

| Experiment | Up/Up | Up/Down | Down/Up | Down/Down |
|------------|-------|---------|---------|-----------|
| DAU        | 0.71  | 0.29    | 0.47    | 0.53      |
| CAPS       | 0.71  | 0.29    | 0.49    | 0.51      |
| Sonar+D    | 0.78* | 0.22    | 0.46    | 0.54      |

\* There are significant differences (-2.53 SD) between DAU and Sonar+D experiments (Binomial process differences test).
