# Supplementary material for: Citizen Social Lab: A digital platform for human behavior experimentation within a citizen science framework
Source: PLOS journal article supplement (doi:10.1371/journal.pone.0207219), 2018-12-06
Supplement: S5 (10.1371/journal.pone.0207219.s005) [file journal.pone.0207219.s005]

**Table S2: Win-Stay Lose-Shift strategy.** Decision conditioned to performance (Strategy/Decision)

| Experiment | Win/Stay | Win/Shift | Lose/Stay | Lose/Shift |
|------------|----------|-----------|-----------|------------|
| DAU        | 0.68     | 0.32      | 0.42      | 0.58       |
| CAPS       | 0.71     | 0.29      | 0.48      | 0.52*      |
| Sonar+D    | 0.72     | 0.28      | 0.40      | 0.60       |

\* There are significant differences (2.35 SD) between DAU and CAPS experiments (Binomial process differences test).
